# Supplementary material
Source: HighWire-hosted journal article supplement (https://ard.bmj.com/content/76/2/371)
Supplement: inline-supplementary-material-1 [file inline-supplementary-material-1.pdf]

**Online supplementary table S1** Univariable associations of GLS and scMWS among RA patients in linear regression analyses

|                                                 | <b>GLS<br/>Beta</b> | <b>p-value</b> | <b>scMWS<br/>Beta</b> | <b>p-value</b> |
|-------------------------------------------------|---------------------|----------------|-----------------------|----------------|
| <b><i>Clinical characteristics</i></b>          |                     |                |                       |                |
| Age (years)                                     | 0.01                | 0.88           | -0.18                 | 0.06           |
| Female gender                                   | -0.20               | 0.03           | 0.17                  | 0.07           |
| Body mass index (kg/m <sup>2</sup> )            | 0.22                | 0.02           | -0.05                 | 0.61           |
| Total cholesterol (mmol/l)                      | -0.16               | 0.09           | 0.03                  | 0.74           |
| Use of statins                                  | 0.10                | 0.28           | -0.16                 | 0.08           |
| Systolic blood pressure (mmHg)                  | 0.26                | 0.004          | -0.20                 | 0.03           |
| Diastolic blood pressure (mmHg)                 | 0.29                | 0.001          | -0.09                 | 0.37           |
| Use of antihypertensive medication              | 0.25                | 0.006          | -0.30                 | 0.001          |
| Hypertension                                    | 0.27                | 0.003          | -0.20                 | 0.04           |
| Diabetes                                        | 0.06                | 0.54           | -0.10                 | 0.28           |
| Current smoking                                 | 0.07                | 0.44           | -0.20                 | 0.03           |
| lnESR (mm/hr)                                   | 0.10                | 0.26           | -0.11                 | 0.22           |
| lnCRP (mg/l)                                    | 0.05                | 0.61           | -0.08                 | 0.37           |
| <b><i>Echocardiographic characteristics</i></b> |                     |                |                       |                |
| Concentric LV geometry                          | 0.17                | 0.06           | -0.62                 | <0.001         |
| Hypertrophy                                     | 0.08                | 0.38           | -0.29                 | 0.001          |
| E/A ratio                                       | -0.15               | 0.12           | -0.01                 | 0.94           |
| E/E'                                            | -0.01               | 0.91           | -0.15                 | 0.11           |
| Ejection fraction (%)                           | -0.22               | 0.02           | 0.21                  | 0.02           |
| scMWS (%)                                       | -0.30               | 0.001          | na                    | na             |
| GLS (%)                                         | na                  | na             | -0.30                 | 0.001          |
| <b><i>RA specific characteristics</i></b>       |                     |                |                       |                |
| Disease duration (years)                        | -0.07               | 0.46           | 0.18                  | 0.05           |
| TNFi                                            | -0.01               | 0.88           | -0.10                 | 0.31           |
| DMARDs                                          | -0.01               | 0.89           | -0.13                 | 0.15           |
| Active RA (SDAI>3.3)                            | 0.25                | 0.006          | -0.26                 | 0.005          |
| lnSDAI score                                    | 0.23                | 0.01           | -0.22                 | 0.02           |
| lnCDAI score                                    | 0.25                | 0.007          | -0.21                 | 0.02           |
| DAS28 score                                     | 0.23                | 0.01           | -0.17                 | 0.06           |
| RF positive                                     | 0.08                | 0.40           | -0.23                 | 0.01           |
| anti-CCP positive                               | 0.13                | 0.17           | -0.11                 | 0.27           |
| MHAQ score                                      | 0.12                | 0.20           | -0.32                 | <0.001         |

Anti-CCP, anti-cyclic citrullinated peptide; DAS28, Disease Activity Score in 28 Joints;

DMARDs, disease-modifying antirheumatic drugs; E/A, early/atrial transmitral peak

velocities; E/E', early peak blood velocity/early diastolic tissue velocity at septal border of

mitral annulus; GLS, global longitudinal strain; lnCDAI, natural logarithm of Clinical Disease Activity Index; lnCRP, natural logarithm of C-reactive protein; lnESR, natural logarithm of erythrocyte sedimentation rate; lnSDAI, natural logarithm of Simplified Disease Activity Index; LV, left ventricular; MHAQ, Modified Health Assessment Questionnaire; RA, rheumatoid arthritis; RF, rheumatoid factor; scMWS, stress-corrected midwall shortening; TNFi, tumour necrosis factor inhibitor.

**Online supplementary table S2** Covariables of scMWS in multivariable linear regression analyses in RA patients

| Independent variable | Dependent variable                                             |       |                                                                |       |                                                                |       |                                                                |       |                                                                |       |
|----------------------|----------------------------------------------------------------|-------|----------------------------------------------------------------|-------|----------------------------------------------------------------|-------|----------------------------------------------------------------|-------|----------------------------------------------------------------|-------|
|                      | scMWS                                                          |       |                                                                |       |                                                                |       |                                                                |       |                                                                |       |
|                      | <u>Model 1</u><br>Multiple<br>R <sup>2</sup> =0.22,<br>p<0.001 |       | <u>Model 2</u><br>Multiple<br>R <sup>2</sup> =0.20,<br>p<0.001 |       | <u>Model 3</u><br>Multiple<br>R <sup>2</sup> =0.20,<br>p<0.001 |       | <u>Model 4</u><br>Multiple<br>R <sup>2</sup> =0.18,<br>p<0.001 |       | <u>Model 5</u><br>Multiple<br>R <sup>2</sup> =0.23,<br>p<0.001 |       |
|                      | Beta                                                           | p     |
| Age (years)          | -0.24                                                          | 0.006 | -0.24                                                          | 0.007 | -0.24                                                          | 0.007 | -0.24                                                          | 0.009 | -0.21                                                          | 0.02  |
| Sex                  | 0.10                                                           | 0.25  | 0.12                                                           | 0.19  | 0.13                                                           | 0.15  | 0.11                                                           | 0.23  | 0.10                                                           | 0.25  |
| Smoking              | -0.23                                                          | 0.009 | -0.24                                                          | 0.008 | -0.23                                                          | 0.009 | -0.25                                                          | 0.004 | -0.23                                                          | 0.007 |
| EF (%)               | 0.23                                                           | 0.01  | 0.23                                                           | 0.01  | 0.23                                                           | 0.01  | 0.24                                                           | 0.01  | 0.23                                                           | 0.01  |
| Active RA            | -0.22                                                          | 0.01  |                                                                |       |                                                                |       |                                                                |       |                                                                |       |
| lnSDAI score         |                                                                |       | -0.18                                                          | 0.04  |                                                                |       |                                                                |       |                                                                |       |
| lnCDAI score         |                                                                |       |                                                                |       | -0.18                                                          | 0.05  |                                                                |       |                                                                |       |
| DAS28 score          |                                                                |       |                                                                |       |                                                                |       | -0.13                                                          | 0.15  |                                                                |       |
| MHAQ score           |                                                                |       |                                                                |       |                                                                |       |                                                                |       | -0.25                                                          | 0.004 |

Active RA is defined as SDAI>3.3.

DAS28, Disease Activity Score in 28 Joints; EF, ejection fraction; lnCDAI, natural logarithm of Clinical Disease Activity Index; lnSDAI, natural logarithm of Simplified Disease Activity Index; MHAQ, Modified Health Assessment Questionnaire; RA, rheumatoid arthritis; scMWS, stress-corrected midwall shortening.

**Online supplementary table S3** Covariables of GLS in multivariable linear regression analyses in RA patients

| Independent variable     | Dependent variable                                             |      |                                                                |      |                                                                |      |                                                                |      |                                                                |       |
|--------------------------|----------------------------------------------------------------|------|----------------------------------------------------------------|------|----------------------------------------------------------------|------|----------------------------------------------------------------|------|----------------------------------------------------------------|-------|
|                          | GLS                                                            |      |                                                                |      |                                                                |      |                                                                |      |                                                                |       |
|                          | <u>Model 1</u><br>Multiple<br>R <sup>2</sup> =0.20,<br>p<0.001 |      | <u>Model 2</u><br>Multiple<br>R <sup>2</sup> =0.19,<br>p=0.001 |      | <u>Model 3</u><br>Multiple<br>R <sup>2</sup> =0.20,<br>p<0.001 |      | <u>Model 4</u><br>Multiple<br>R <sup>2</sup> =0.20,<br>p<0.001 |      | <u>Model 5</u><br>Multiple<br>R <sup>2</sup> =0.17,<br>p=0.002 |       |
|                          | Beta                                                           | p     |
| Age (years)              | -0.10                                                          | 0.31 | -0.10                                                          | 0.32 | -0.10                                                          | 0.33 | -0.10                                                          | 0.30 | -0.13                                                          | 0.20  |
| Sex                      | -0.08                                                          | 0.40 | -0.10                                                          | 0.29 | -0.13                                                          | 0.20 | -0.09                                                          | 0.35 | -0.07                                                          | 0.45  |
| Systolic BP (mmHg)       | 0.25                                                           | 0.02 | 0.25                                                           | 0.02 | 0.24                                                           | 0.02 | 0.24                                                           | 0.02 | 0.28                                                           | 0.007 |
| EF (%)                   | -0.16                                                          | 0.07 | -0.16                                                          | 0.07 | -0.16                                                          | 0.08 | -0.16                                                          | 0.07 | -0.18                                                          | 0.06  |
| BMI (kg/m <sup>2</sup> ) | 0.15                                                           | 0.09 | 0.14                                                           | 0.14 | 0.13                                                           | 0.16 | 0.17                                                           | 0.06 | 0.15                                                           | 0.12  |
| Active RA                | 0.21                                                           | 0.02 |                                                                |      |                                                                |      |                                                                |      |                                                                |       |
| lnSDAI score             |                                                                |      | 0.18                                                           | 0.04 |                                                                |      |                                                                |      |                                                                |       |
| lnCDAI score             |                                                                |      |                                                                |      | 0.22                                                           | 0.02 |                                                                |      |                                                                |       |
| DAS28 score              |                                                                |      |                                                                |      |                                                                |      | 0.21                                                           | 0.02 |                                                                |       |
| MHAQ score               |                                                                |      |                                                                |      |                                                                |      |                                                                |      | 0.08                                                           | 0.35  |

Active RA is defined as SDAI>3.3.

BMI, body mass index; BP, blood pressure; DAS28, Disease Activity Score in 28 Joints; EF, ejection fraction; GLS, global longitudinal strain; lnCDAI, natural logarithm of Clinical Disease Activity Index; lnSDAI, natural logarithm of Simplified Disease Activity Index; MHAQ, Modified Health Assessment Questionnaire; RA, rheumatoid arthritis.
